# Supplementary figures and images for: The Build-Up of Aerosols Carrying the SARS-CoV-2 Coronavirus, in Poorly Ventilated, Confined Spaces
Source: Research Square preprint supplement (doi:10.21203/rs.3.rs-110711/v1), 2020-12-02

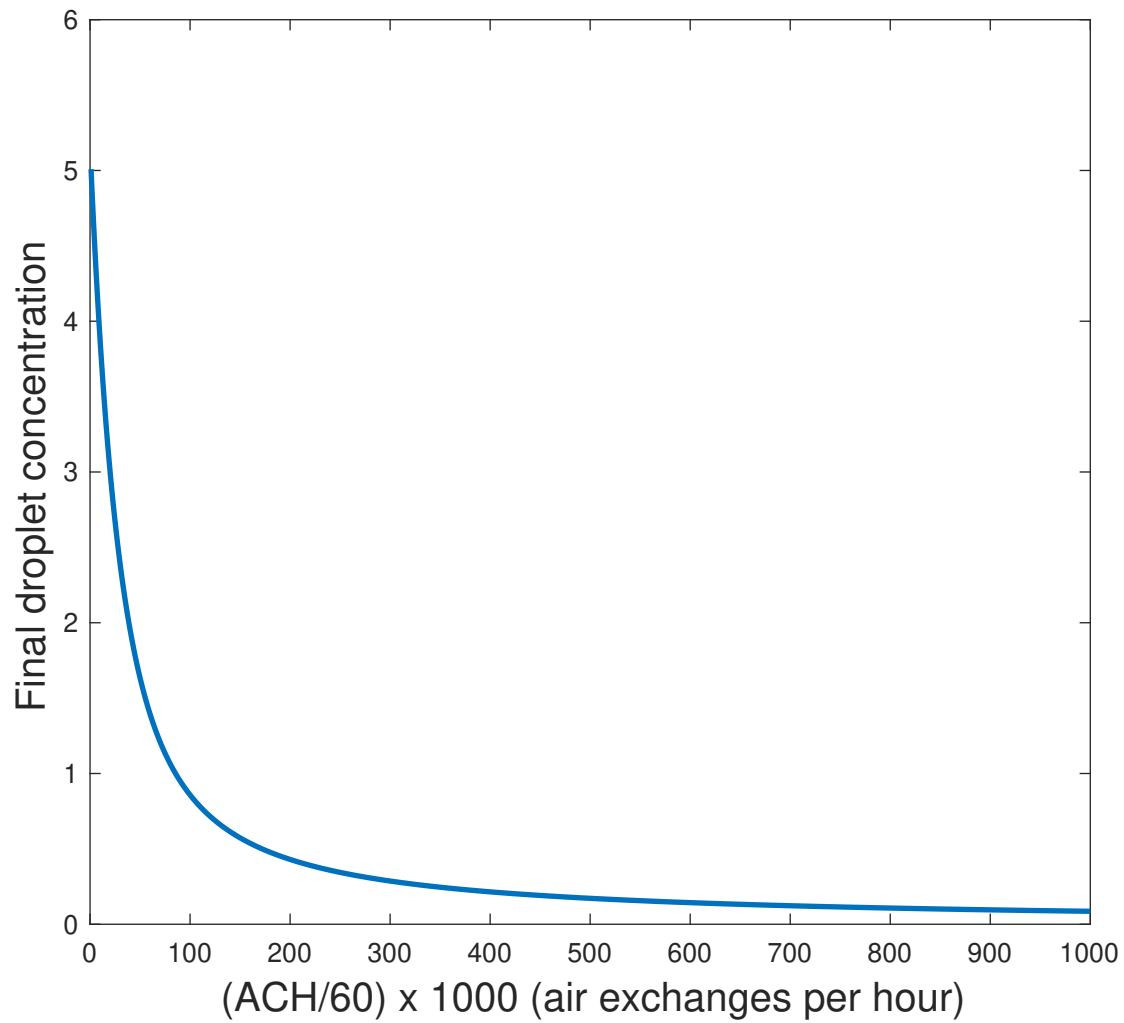

Supplement: Supplementary file 1 [file 4a6dbe5b8c450302e470368c.zip]

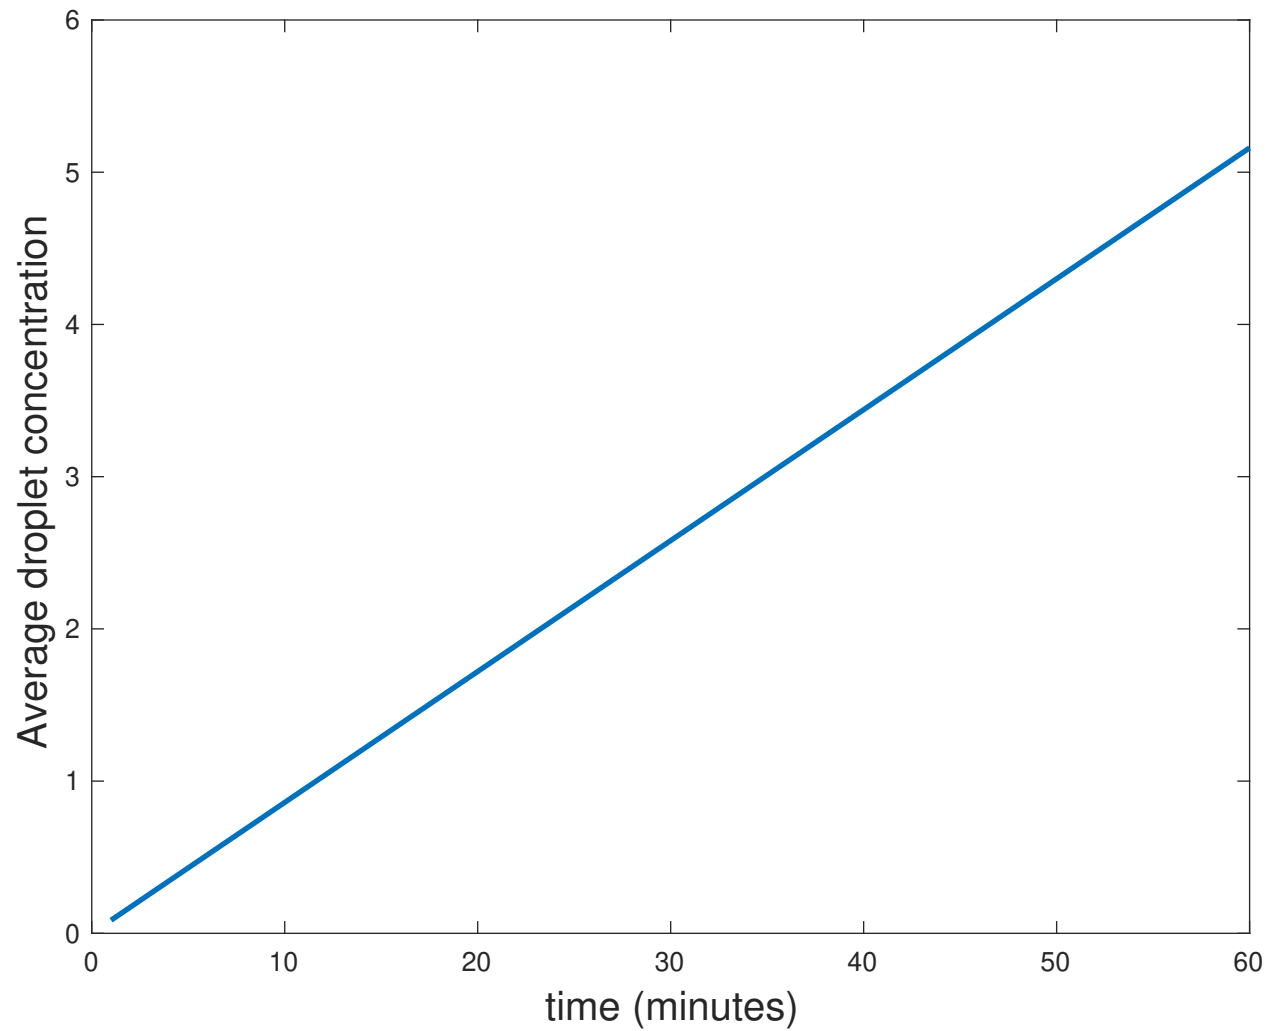

Supplement: Supplementary file 2 [file 4a6dbe5b8c450302e470368c.zip]

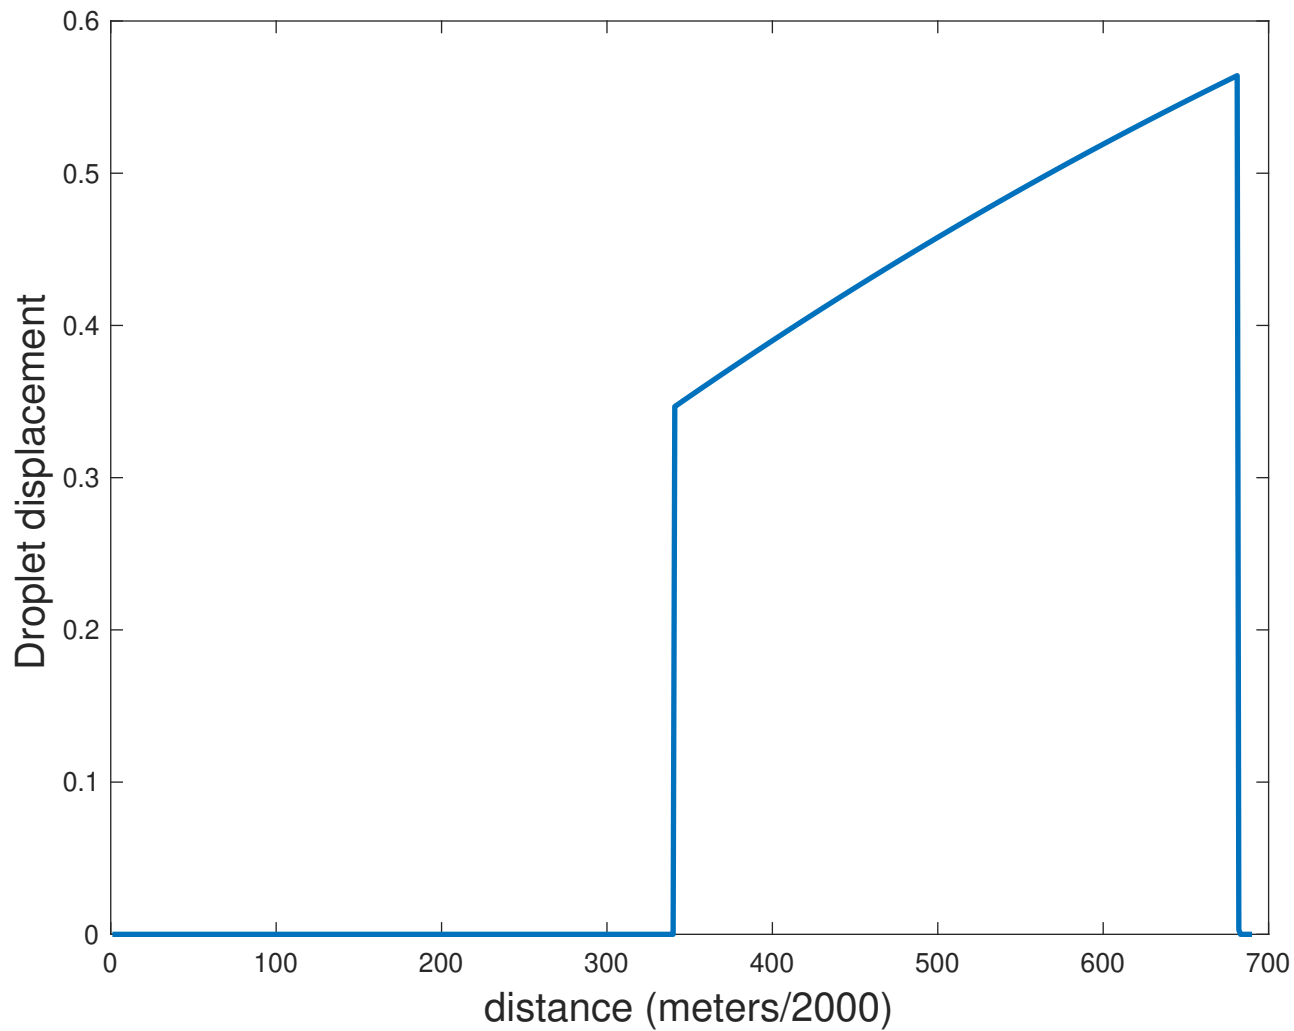

Supplement: Supplementary file 5 [file 4a6dbe5b8c450302e470368c.zip]

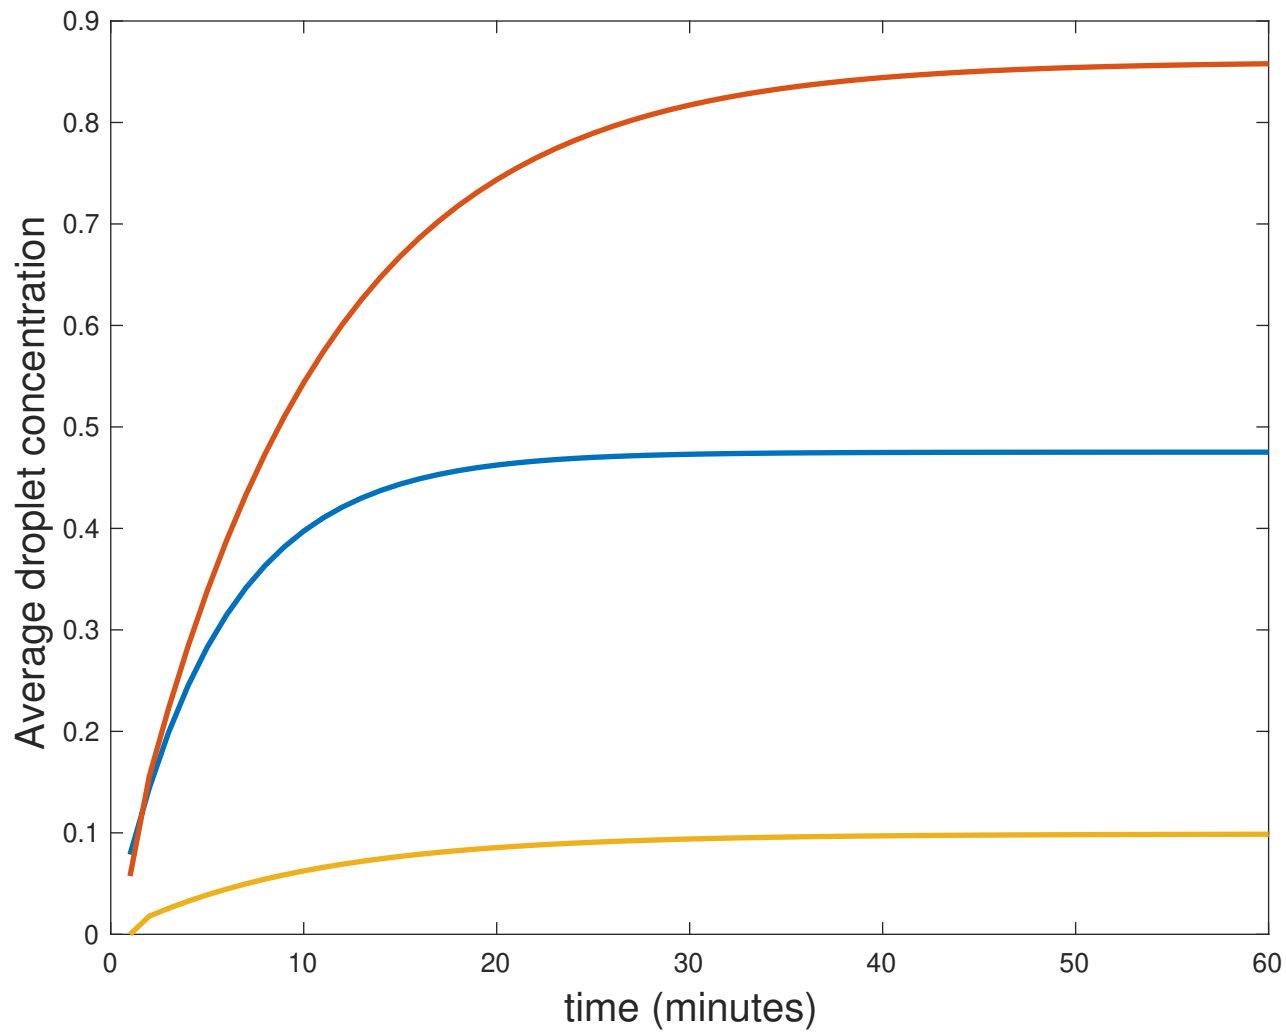

Supplement: Supplementary file 7 [file 4a6dbe5b8c450302e470368c.zip]

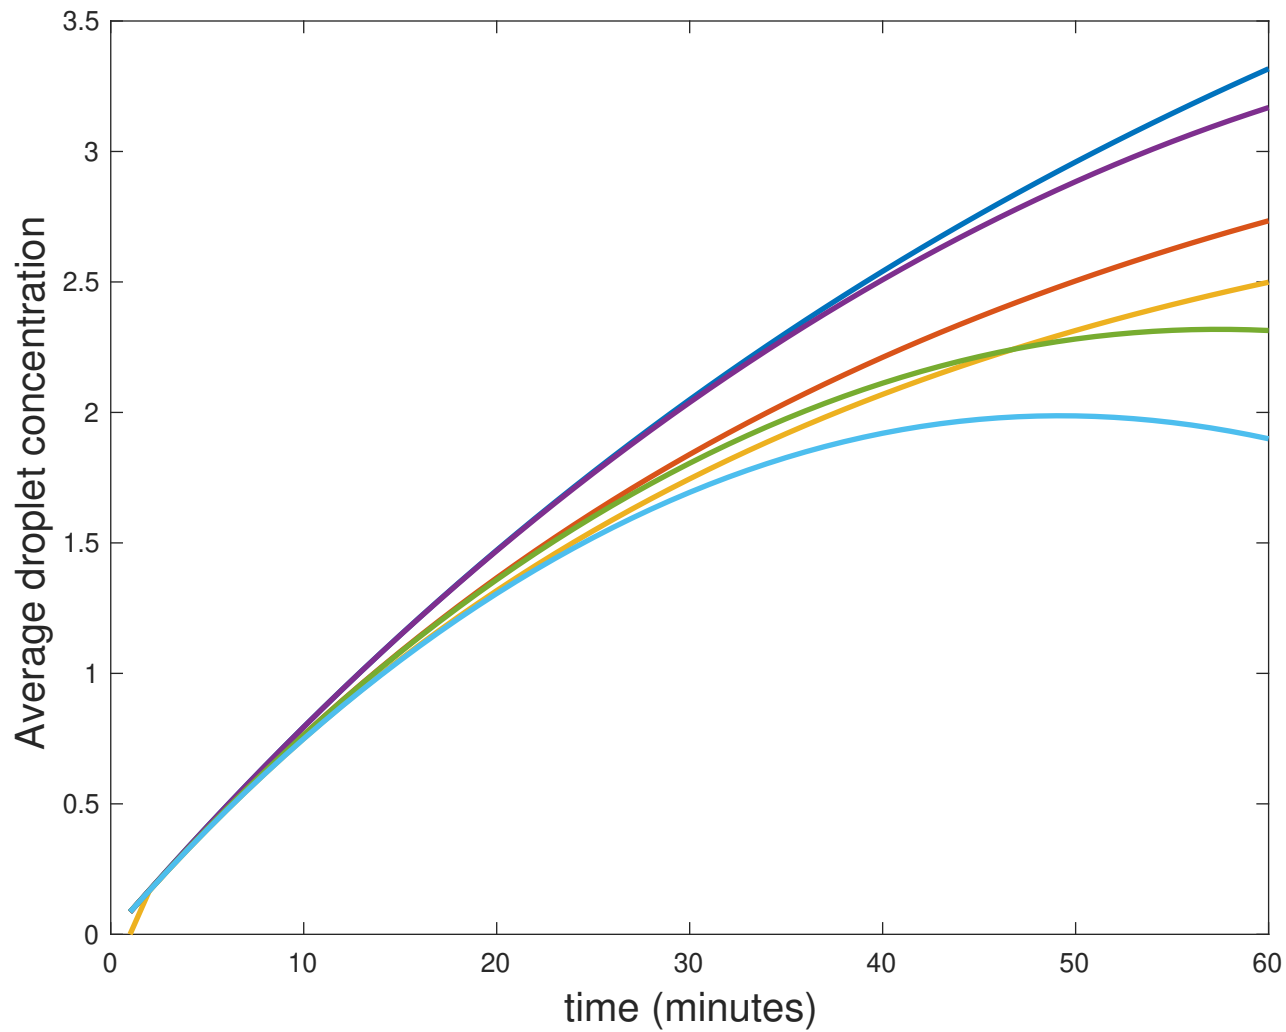

Supplement: Supplementary file 8 [file 4a6dbe5b8c450302e470368c.zip]

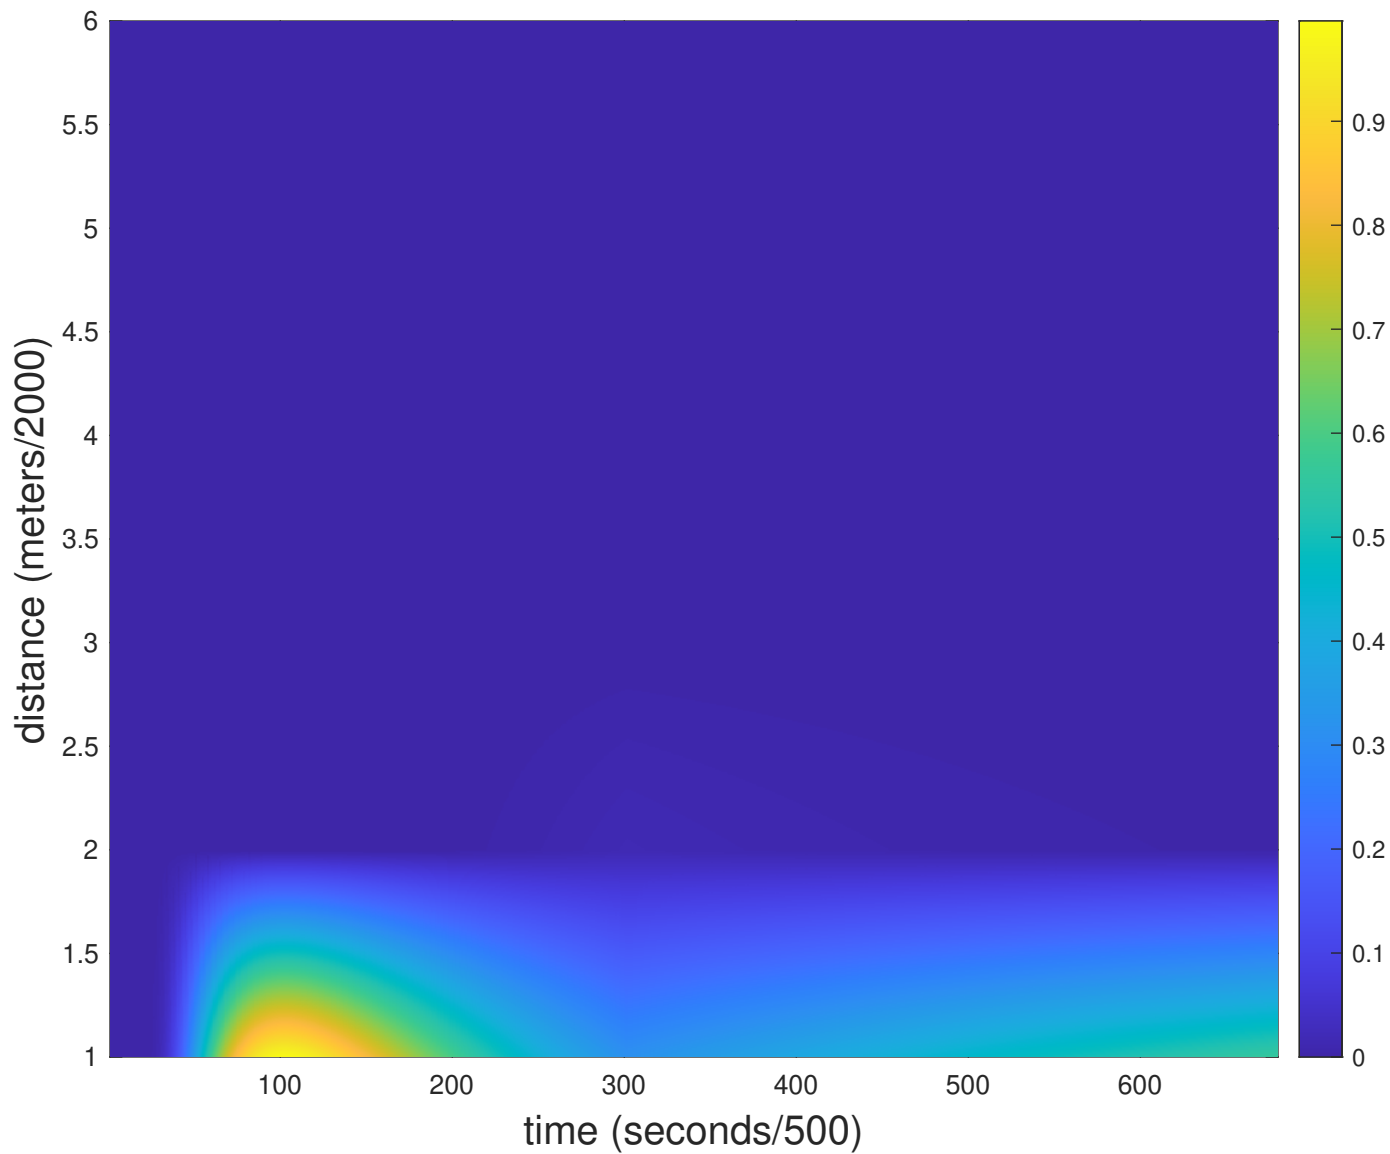

Supplement: Supplementary file 9 [file 4a6dbe5b8c450302e470368c.zip]

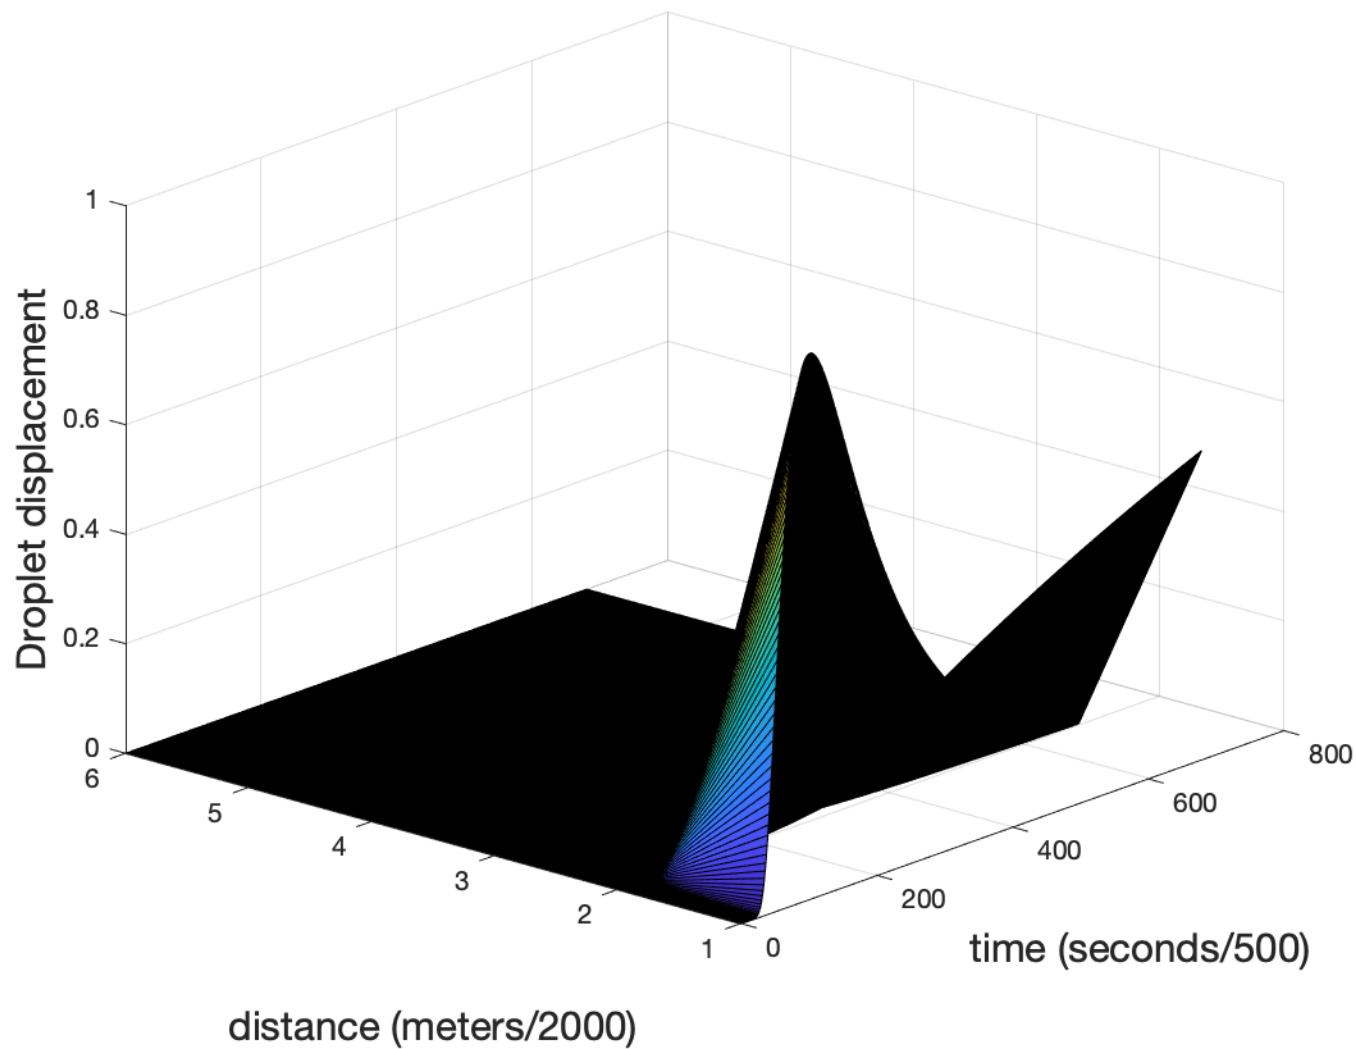

Supplement: Supplementary file 10 [file 4a6dbe5b8c450302e470368c.zip]

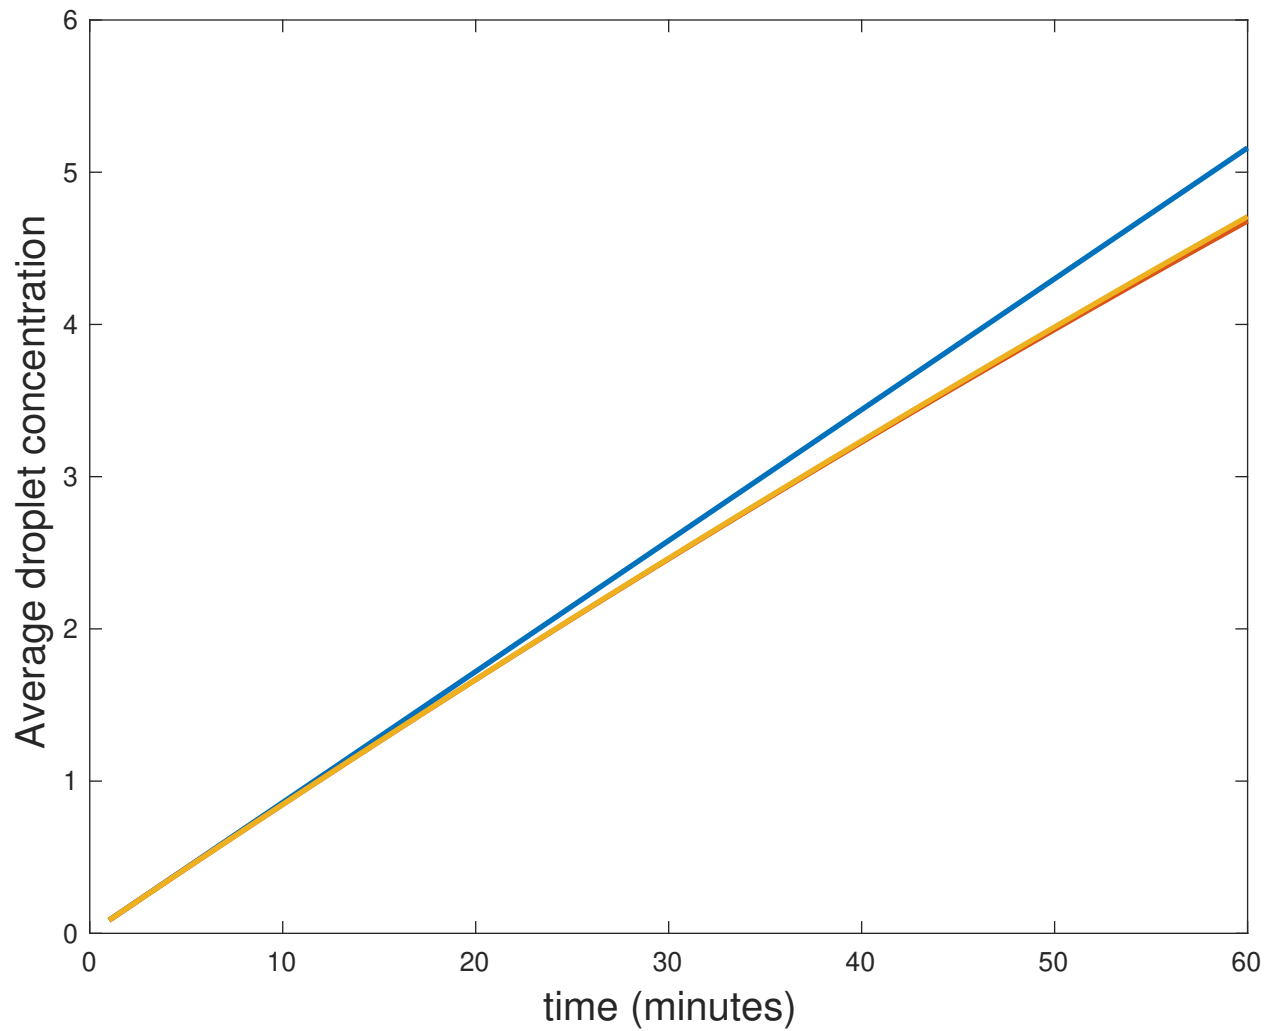

Supplement: Supplementary file 11 [file 4a6dbe5b8c450302e470368c.zip]

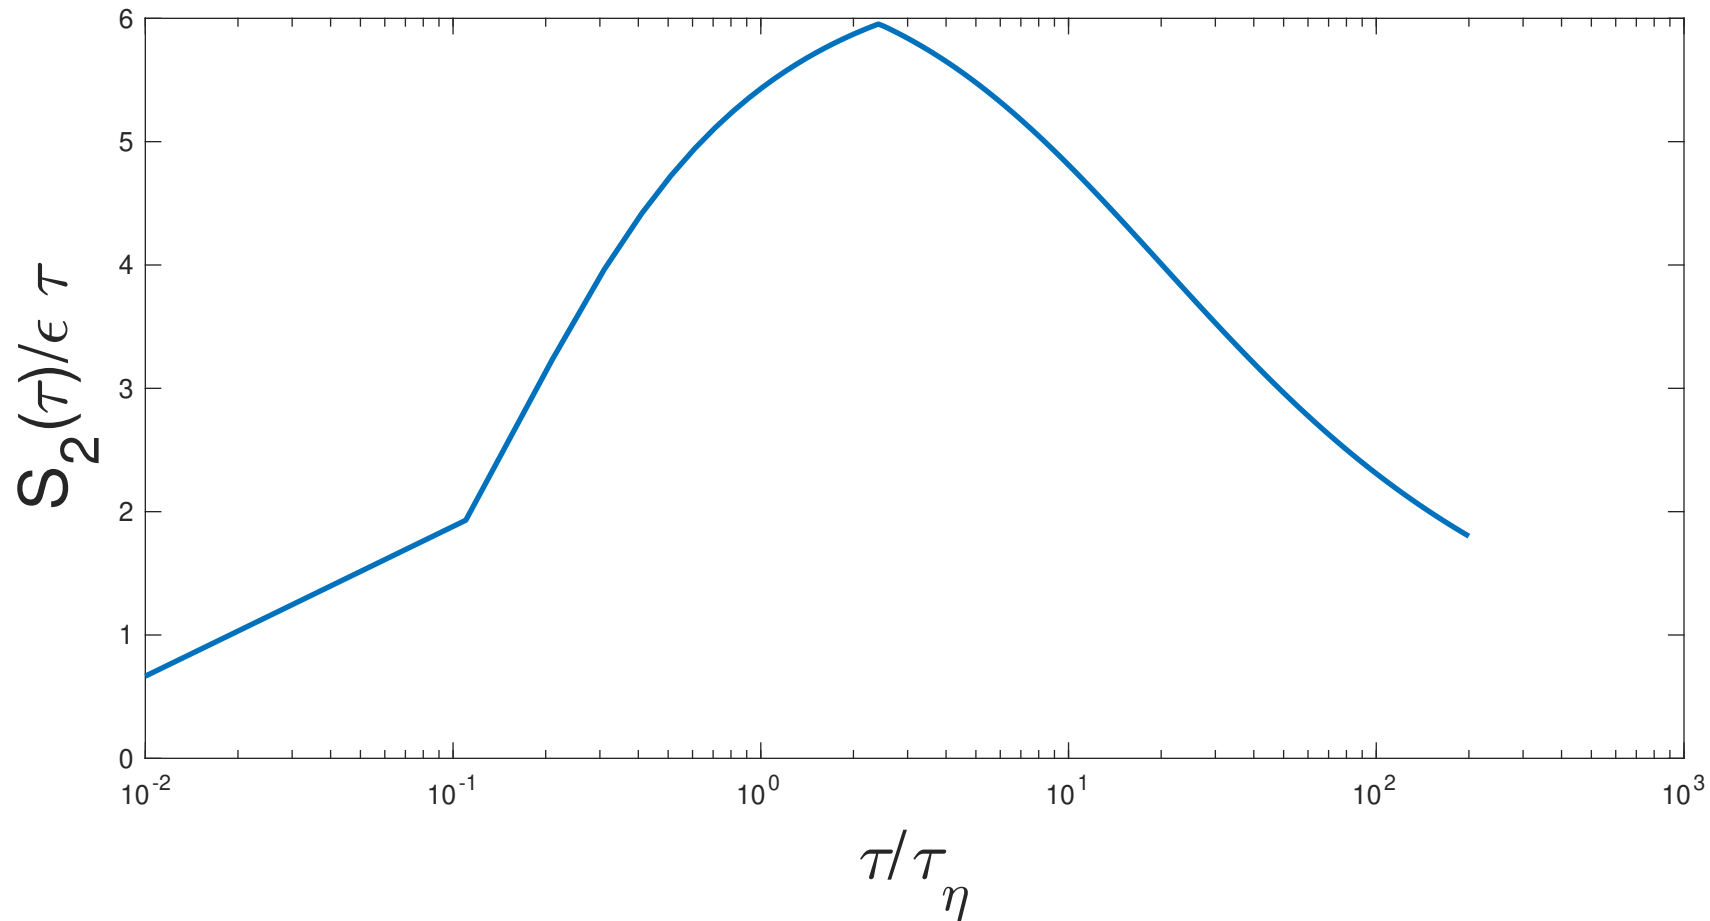

Supplement: Supplementary file 12 [file 4a6dbe5b8c450302e470368c.zip]

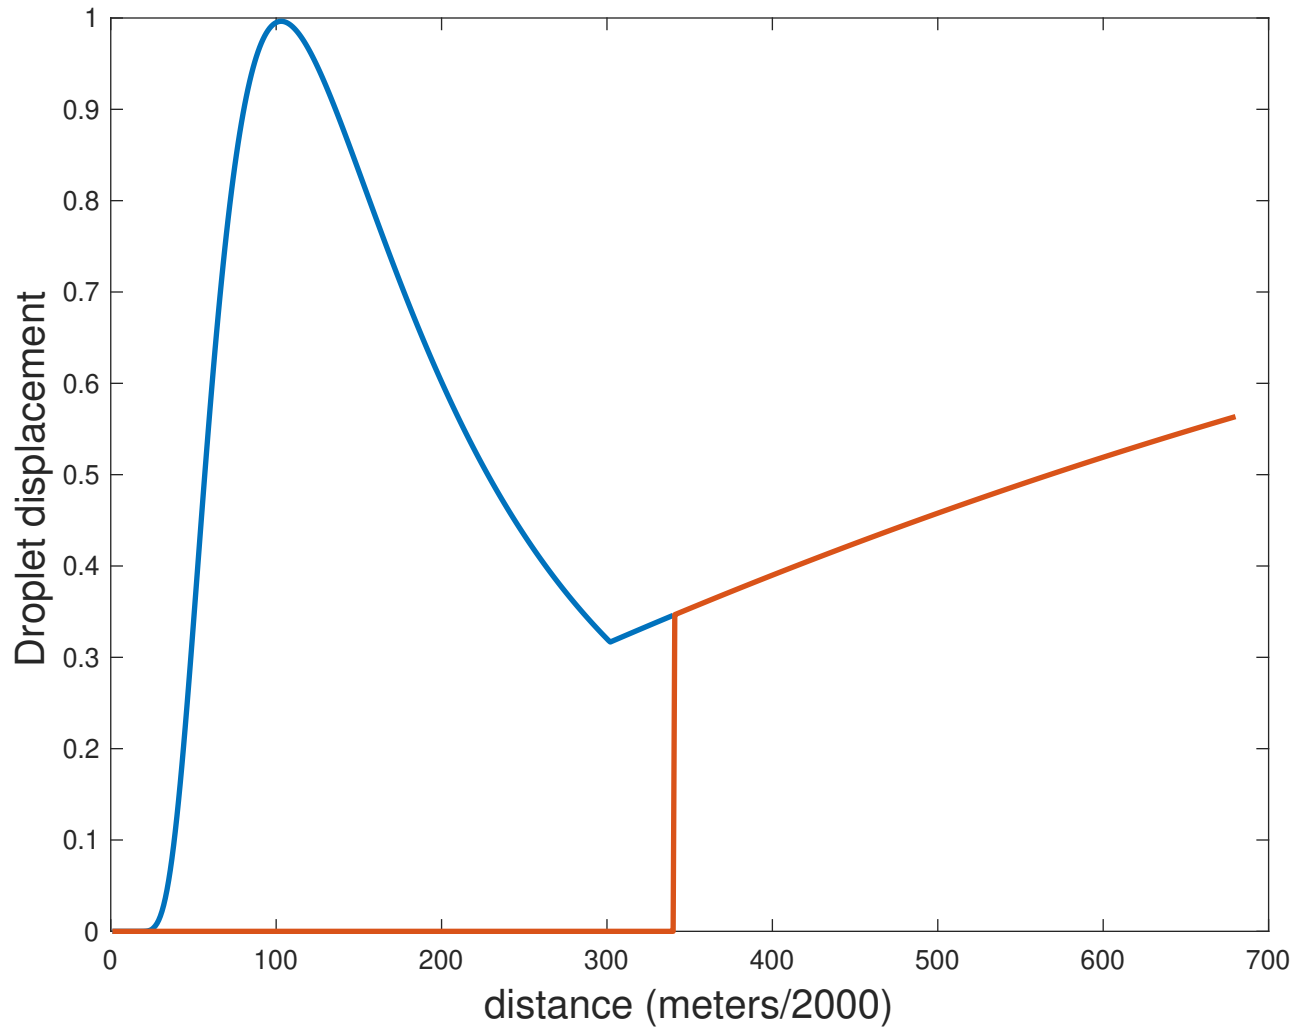

Supplement: Supplementary file 13 [file 4a6dbe5b8c450302e470368c.zip]

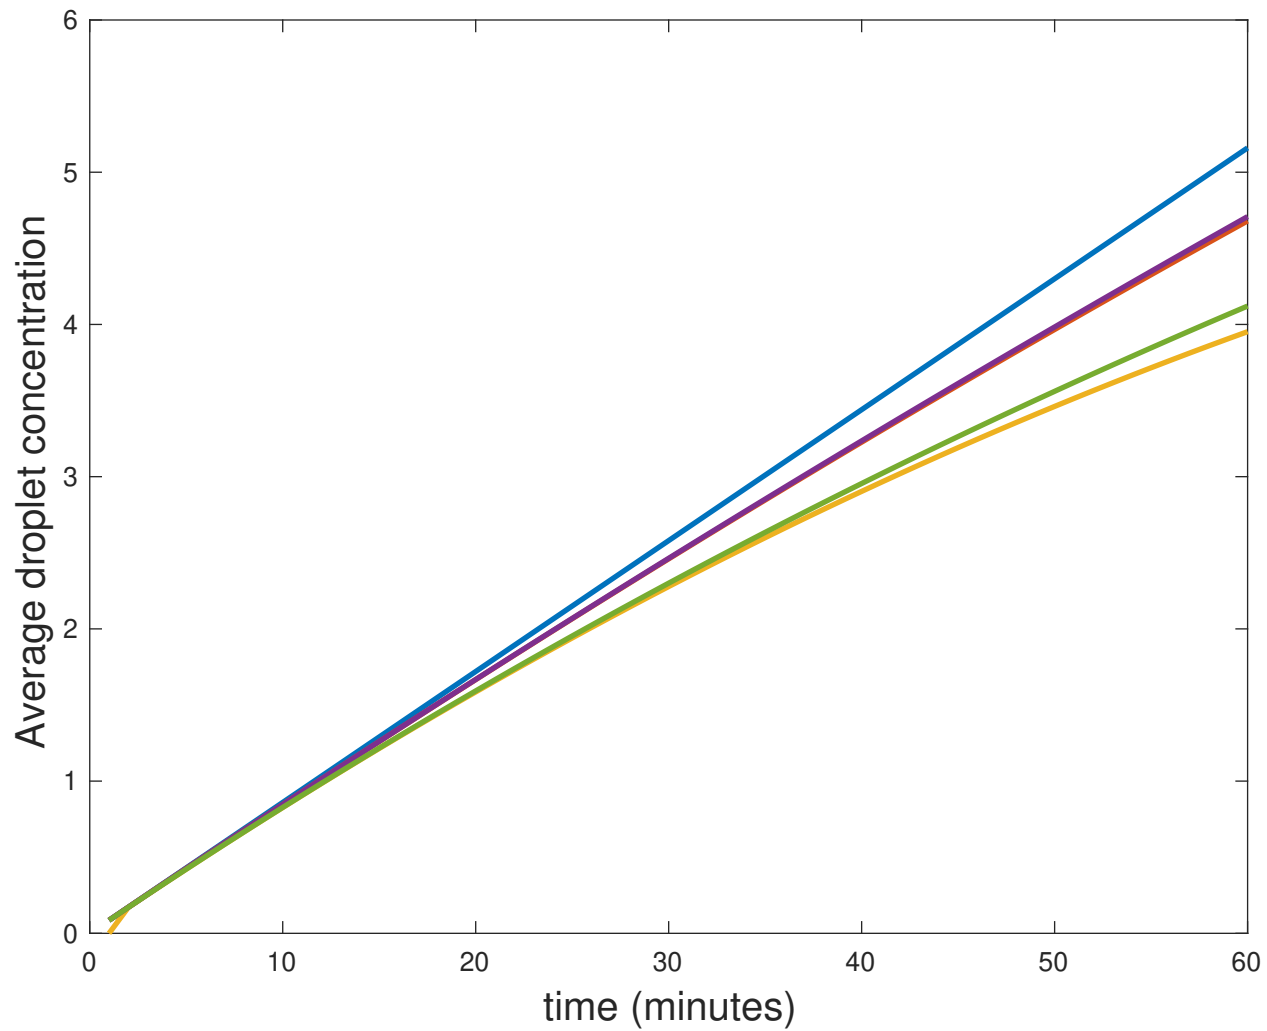

Supplement: Supplementary file 14 [file 4a6dbe5b8c450302e470368c.zip]

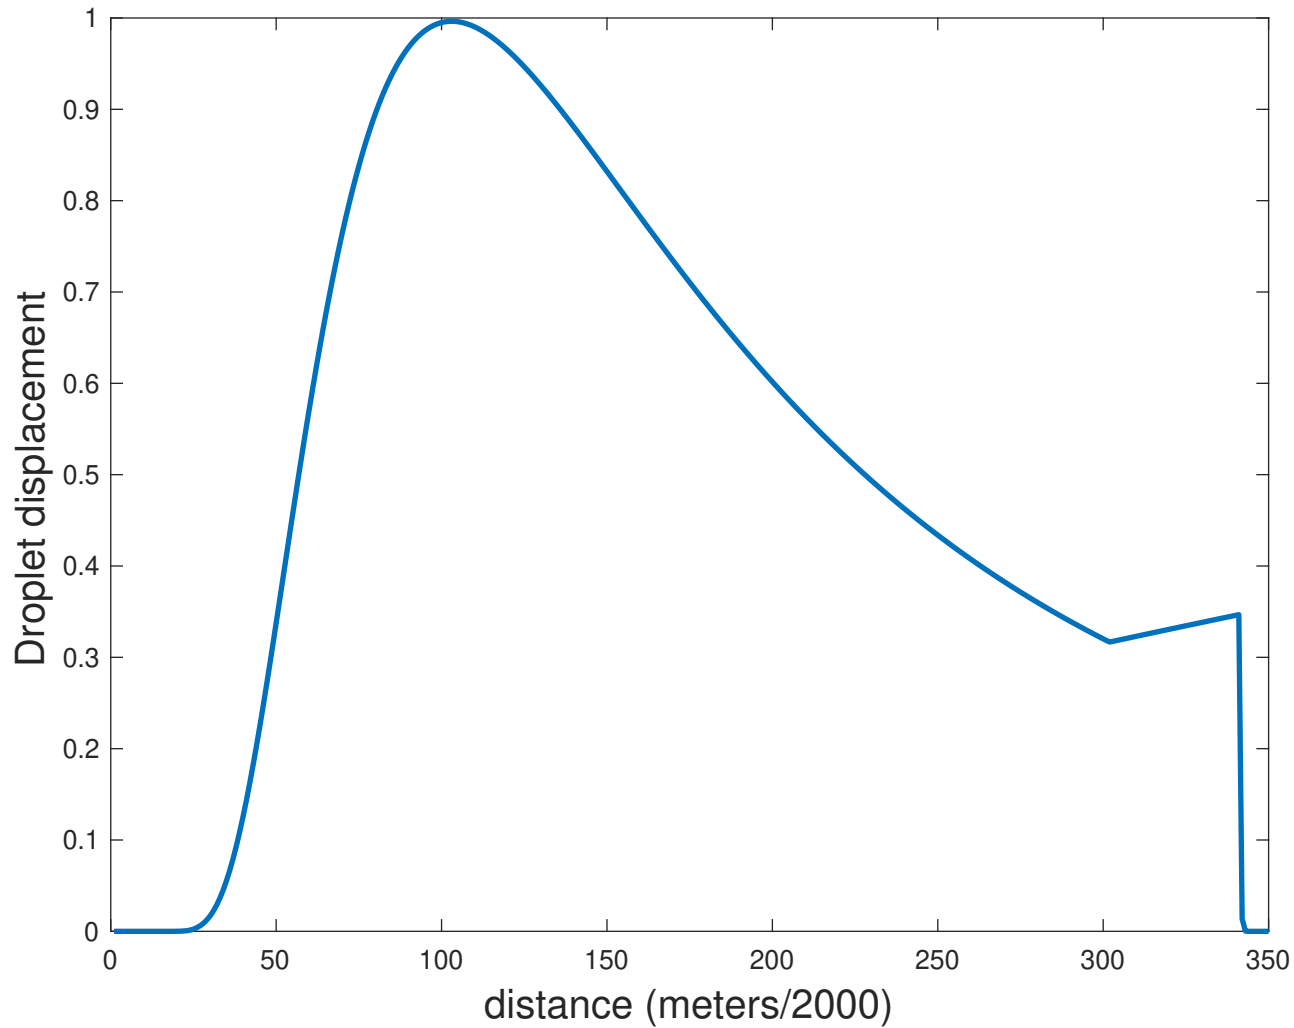

Supplement: Supplementary file 15 [file 4a6dbe5b8c450302e470368c.zip]

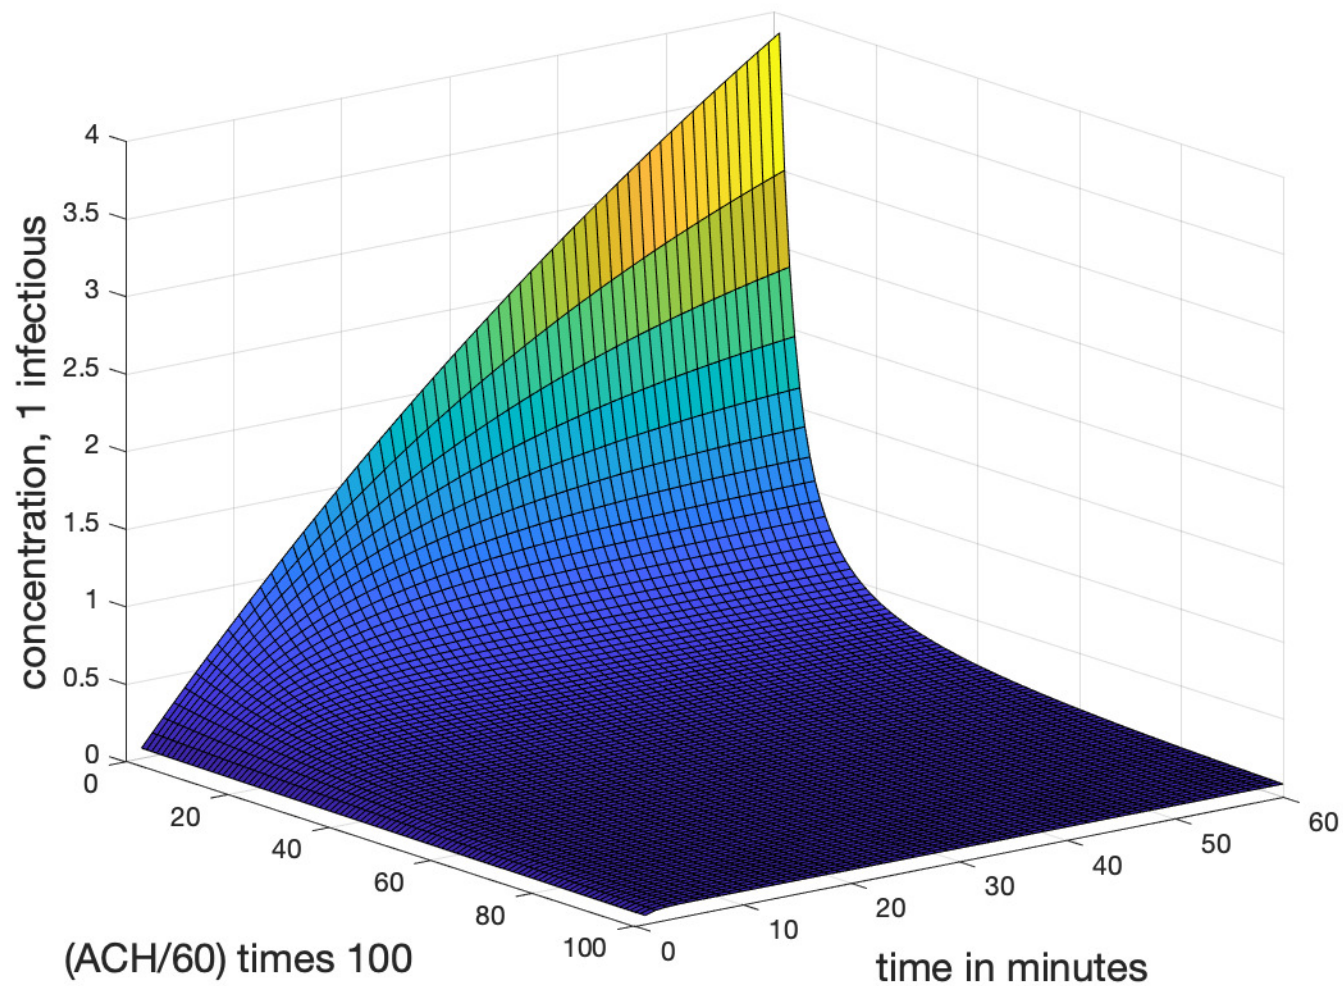

Supplement: Supplementary file 16 [file 4a6dbe5b8c450302e470368c.zip]

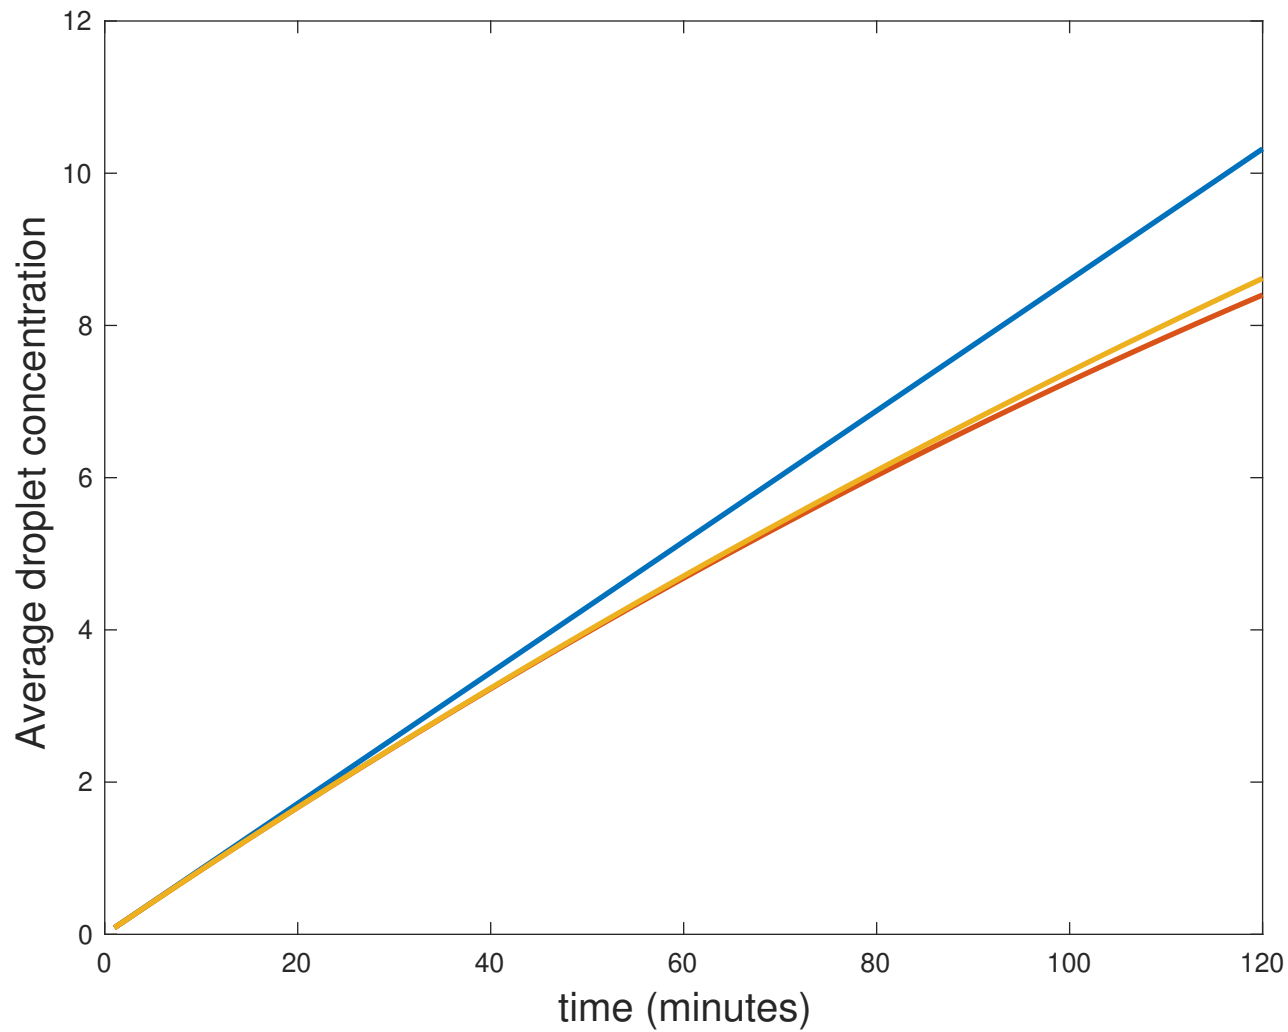

Supplement: Supplementary file 17 [file 4a6dbe5b8c450302e470368c.zip]
